# Supplementary material for: Inter- and Intra-Observer Variability and the Effect of Experience in Cine-MRI for Adhesion Detection
Source: MDPI journal article supplement (doi:10.3390/jimaging9030055), 2023-02-23
Supplement: s1 [file s1]

Figure S2: ROC operating points

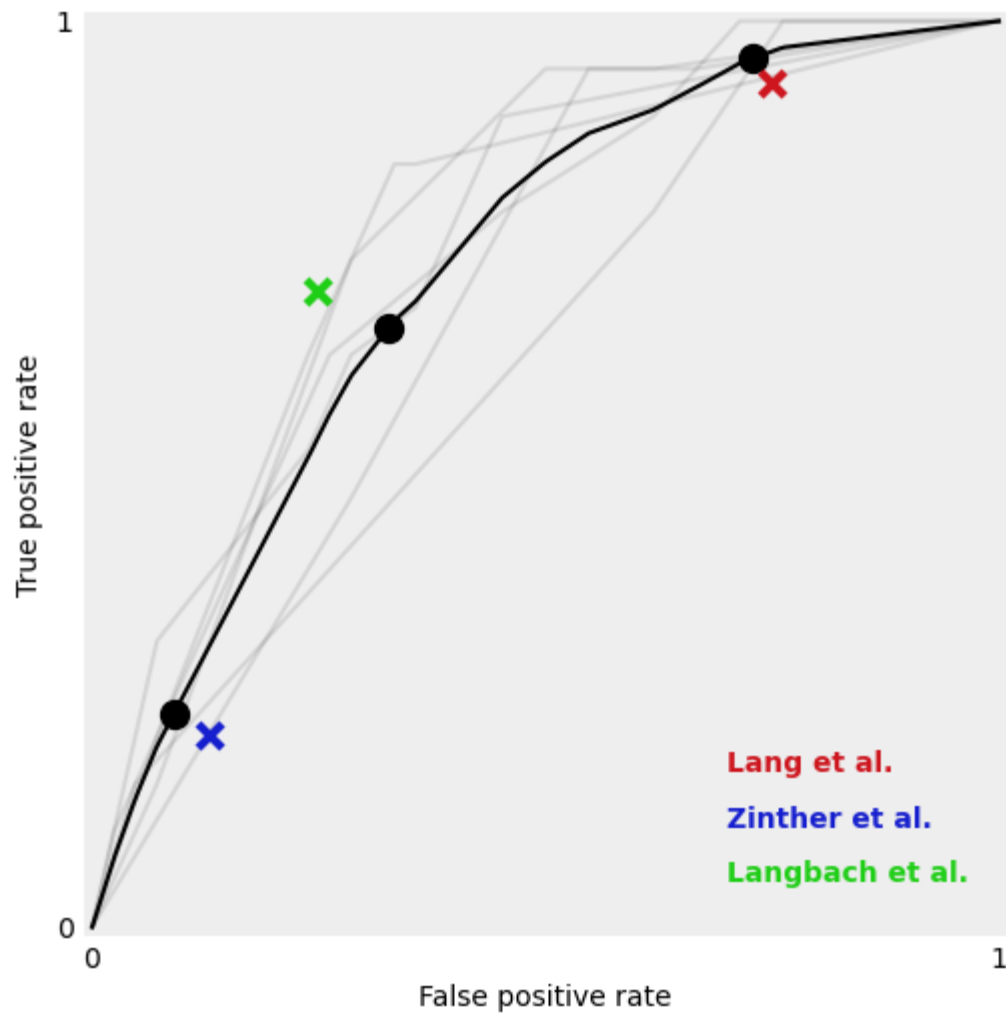

The average AUC for the high-year group, with three operating points (black dots) matching results in literature mentioned in the Discussion (crosses).
