# Supplementary material for: Inter- and Intra-Observer Variability and the Effect of Experience in Cine-MRI for Adhesion Detection
Source: MDPI journal article supplement (doi:10.3390/jimaging9030055), 2023-02-23

## Observer tutorial

All observers had access to an online tutorial study of 4 cases, with a short text explaining the most important aspects of adhesion detection. The study is openly available here:

<https://grand-challenge.org/reader-studies/adhesion-cine-mri-tutorial/>

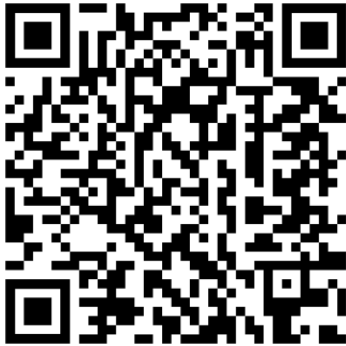

## Online observer environment

Below, a screenshot of the online environment that was used to run this observer study.

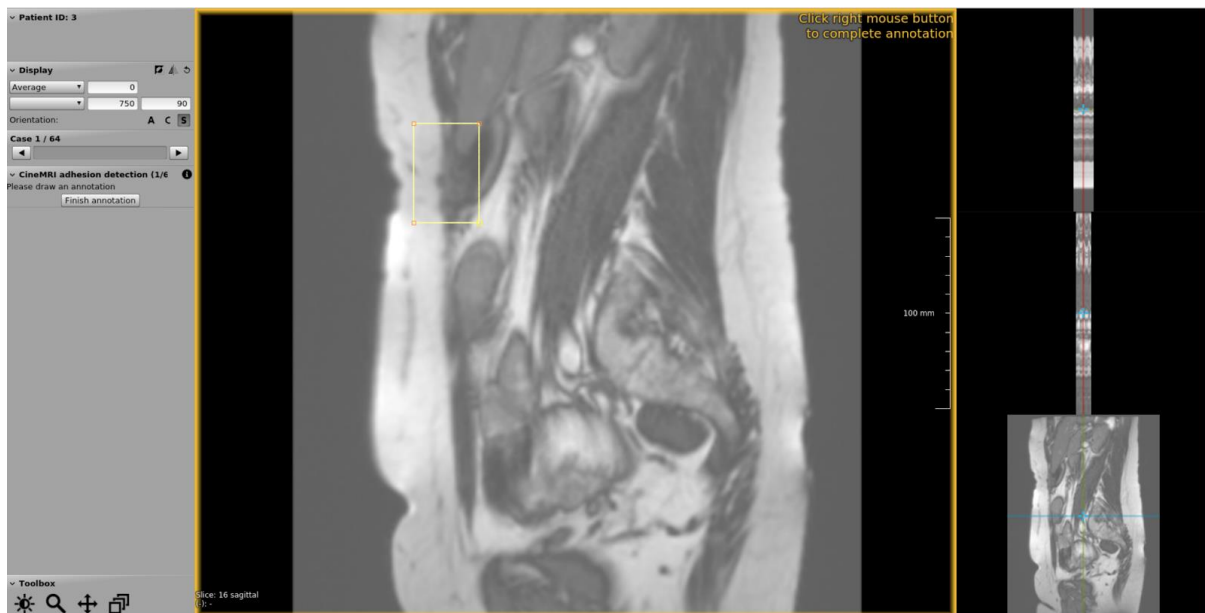

Supplement: s1 [file s1]
