# Supplementary material for: Inter- and Intra-Observer Variability and the Effect of Experience in Cine-MRI for Adhesion Detection
Source: J Imaging. 2023 Feb 23;9(3):55. doi: 10.3390/jimaging9030055 (PMC10054690; doi:10.3390/jimaging9030055)
Supplement: Supplementary file 1 [file jimaging-09-00055-s001.zip]

Archive with 5 entries (5 files):
- Figure S1.pdf
- Figure S2.pdf
- Video S1.mp4
- Video S2.mp4
- Video S3.mp4
